# Supplementary material for: Quality of outpatient parenteral antimicrobial therapy (OPAT) care from the patient’s perspective: a qualitative study
Source: PubMed Central journal article supplement — BMJ Open. 2018 Nov 12;8(11):e024564. doi: 10.1136/bmjopen-2018-024564 (PMC6252647; doi:10.1136/bmjopen-2018-024564), 2018-11-12
Supplement: bmjopen-2018-024564.draft_revisions.pdf [file bmjopen-2018-024564.draft_revisions.pdf]

# BMJ Open

BMJ Open is committed to open peer review. As part of this commitment we make the peer review history of every article we publish publicly available.

When an article is published we post the peer reviewers' comments and the authors' responses online. We also post the versions of the paper that were used during peer review. These are the versions that the peer review comments apply to.

The versions of the paper that follow are the versions that were submitted during the peer review process. They are not the versions of record or the final published versions. They should not be cited or distributed as the published version of this manuscript.

BMJ Open is an open access journal and the full, final, typeset and author-corrected version of record of the manuscript is available on our site with no access controls, subscription charges or pay-per-view fees (<http://bmjopen.bmj.com>).

If you have any questions on BMJ Open's open peer review process please email [info.bmjopen@bmj.com](mailto:info.bmjopen@bmj.com)

# BMJ Open

## Quality of outpatient parenteral antimicrobial therapy (OPAT) care from the patient's perspective: a qualitative study

|                               |                                                                                                                                                                                                                                                                                                                                                                                         |
|-------------------------------|-----------------------------------------------------------------------------------------------------------------------------------------------------------------------------------------------------------------------------------------------------------------------------------------------------------------------------------------------------------------------------------------|
| Journal:                      | <i>BMJ Open</i>                                                                                                                                                                                                                                                                                                                                                                         |
| Manuscript ID                 | bmjopen-2018-024564                                                                                                                                                                                                                                                                                                                                                                     |
| Article Type:                 | Research                                                                                                                                                                                                                                                                                                                                                                                |
| Date Submitted by the Author: | 01-Jun-2018                                                                                                                                                                                                                                                                                                                                                                             |
| Complete List of Authors:     | Berrevoets, Marvin; Radboudumc, Infectious diseases<br>Oerlemans, Anke; Radboudumc, Infectious diseases<br>Tromp, Mirjam; Radboudumc, Infectious diseases<br>Kullberg, Bart Jan; Radboudumc, Infectious diseases<br>ten Oever, Jaap; Radboud University Nijmegen Medical Centre,<br>Schouten, Jeroen; Radboudumc, Infectious diseases<br>Hulscher, M; Radboud University Medical Center |
| Keywords:                     | OPAT, Outpatient Parenteral Antimicrobial Therapy, Patient Experiences, QUALITATIVE RESEARCH, patient-centeredness                                                                                                                                                                                                                                                                      |
|                               |                                                                                                                                                                                                                                                                                                                                                                                         |

SCHOLARONE™  
Manuscripts

Peer Review Only

1  
2  
3 1 **Quality of outpatient parenteral antimicrobial therapy (OPAT) care from the patient's perspective:**  
4 2 **a qualitative study**

5  
6 3 Marvin A.H. Berrevoets<sup>1,2\*</sup>, Anke J.M. Oerlemans<sup>2</sup>, Mirjam Tromp<sup>1</sup>, Bart Jan Kullberg<sup>1</sup>, Jaap ten  
7 4 Oever<sup>1</sup>, Jeroen A. Schouten<sup>1,2</sup>, Marlies E. Hulscher<sup>1,2</sup>  
8  
9

10 5  
11  
12 6 **Affiliations:**

13  
14 7 <sup>1</sup> Radboud Center for Infectious Diseases, Radboud university medical center, Nijmegen, the  
15 8 Netherlands

16  
17 9 <sup>2</sup>Scientific Center for Quality of Healthcare, Radboud Institute for Health Sciences, Radboud  
18 10 university medical center, Nijmegen, the Netherlands.

19  
20  
21  
22 12 \*Corresponding author:

23 13 Marvin A.H. Berrevoets, M.D.

24 14 Department of Internal Medicine and Infectious Diseases

25 15 P.O. box 9101, 6500 HB, Nijmegen, the Netherlands

26 16 E-mail: Marvin.Berrevoets@radboudumc.nl  
27  
28  
29  
30  
31

32 18 Conflicts of interest: none

33 19 Word count: 2647 words  
34  
35  
36

37 21 **Running title:** Patients' perspectives on OPAT care  
38  
39  
40  
41  
42  
43  
44  
45  
46  
47  
48  
49  
50  
51  
52  
53  
54  
55  
56  
57  
58  
59  
60

**ABSTRACT**

**Objectives:** Current outpatient parenteral antimicrobial therapy (OPAT) guidelines recommend delivering patient-centered care. However, little is known about what patients define as good quality of OPAT care and what their needs and preferences are.

The aim of this qualitative study is to explore the patients' perspective on high quality care, and to explore what patient-centered care means to adult OPAT patients.

**Design and setting:** This is an explorative, descriptive study using qualitative methods. We conducted focus group interviews with adult patients who received OPAT, and individual semi-structured interviews with their informal caregivers in the Netherlands.

**Results:** Participants appointed several elements considered important for patient-centered OPAT care, like patient involvement in decision-making, a responsible OPAT lead, intensive collaboration between all disciplines involved, information provision, and adherence to hygiene guidelines. Two central values emerged as essential constituents of patient-centered OPAT care: freedom and safety. Both are heavily influenced by the behaviours of healthcare professionals and by organisational aspects beyond the direct influence of these professionals.

**Conclusion:** This study provides insights into the needs and preferences of adult patients who receive OPAT care. Future interventions directed at the improvement of patient-centeredness of OPAT care should focus on elements that enhance patients' feelings of freedom and safety.

**Keywords:** OPAT; Outpatient Parenteral Antimicrobial Therapy; Patient Experiences; Qualitative; patient-centeredness;

**Strength's and limitations of the study**

- This is the first study that explored the needs and preferences of patients who receive OPAT care.
- We recruited patients from three different hospitals and used purposive sampling to recruit a diverse and representative study population.
- All 8 Picker dimensions of patient-centered care were discussed in the focus group interviews.
- Only one OPAT care model – administration by a visiting specialist nurse – was represented in our study.

1  
2  
3 58 **INTRODUCTION**

4 59 Outpatient parenteral antimicrobial therapy (OPAT) is a treatment option that enables patients to  
5  
6 60 receive parenteral antimicrobials at home, as an alternative to inpatient care. OPAT has been used  
7  
8 61 for over 40 years, and a growing body of research supports its clinical applicability and cost-  
9  
10 62 effectiveness. The primary goals of outpatient therapy programs are to allow patients to complete  
11  
12 63 treatment safely and effectively in the comfort of their home or another outpatient site, and to avoid  
13  
14 64 the potential inconveniences, complications, and expense of hospitalization.<sup>1</sup>

15 65 Current guidelines for OPAT recommend the provision of high quality, patient-centered care that is  
16  
17 66 easily accessible.<sup>1,2</sup> The Institute of Medicine has defined patient-centered care as ‘providing care  
18  
19 67 that is respectful of and responsive to individual patient preferences, needs and values, and ensuring  
20  
21 68 that patient values guide all clinical decisions’.<sup>3</sup> There is a growing body of evidence that improving  
22  
23 69 the patient-centeredness of care can lead to positive clinical outcomes for patients.<sup>4</sup> Limited  
24  
25 70 information about the patient-centeredness of OPAT care is available. Previous studies that have  
26  
27 71 assessed patient experiences only focused on satisfaction and quality of life.<sup>5-8</sup> However, patient  
28  
29 72 satisfaction and patient centeredness are different concepts<sup>9</sup>. To our knowledge, the needs and  
30  
31 73 preferences of patients regarding OPAT care have not been determined.

32  
33  
34  
35  
36  
37  
38  
39  
40  
41  
42  
43  
44  
45  
46  
47  
48  
49  
50  
51  
52  
53  
54  
55  
56  
57  
58  
59  
60 74 The aim of this study is to explore patients’ needs, and preferences for high quality OPAT care, and to  
75 explore what “patient-centered care” means to adult OPAT patients.

## 76 **Methods**

77 We conducted focus group interviews with patients to explore all relevant preferences, and needs  
78 for patient-centered care, and individual interviews with caregivers. All interviews took place in  
79 March-May 2017.

### 81 **Focus group interviews**

82 Recruitment for the focus group interviews took place through 3 hospitals in the Netherlands: one  
83 university hospital, one non-university teaching hospital, and one tertiary care hospital that  
84 specialises in prosthetic joint infections. We selected patients who received  $\geq 2$  doses of intravenous  
85 antibiotics at home,  $\leq 3$  months before the focus group meetings occurred. We used purposive  
86 sampling to ensure diversity of participants (i.e. age, gender, diagnosis, and treatment duration).<sup>10</sup>  
87 Patients were invited to participate by their physician. Participants were informed by (e)mail about  
88 the study objectives, and subsequently asked to participate. The focus groups took place at the  
89 hospital where patients had been treated. The number of focus groups depended on the point of  
90 saturation, i.e. when no new information could be identified from the data.<sup>11</sup> We aimed for groups of  
91 four to eight participants.<sup>12</sup>

92 Focus group interviews were led by an experienced moderator (AO), in the presence of one  
93 researcher (MB). Each focus group interview commenced by explaining the goal of the meeting,  
94 introducing the researchers and the group participants.

95 We used a semi-structured focus group guide, based on the 8 principles of patient-centered care  
96 (Box 1), defined by the Picker Institute<sup>13</sup>, and discussed the 3 phases of OPAT care: 1. Initiation of  
97 OPAT; 2. Transition of OPAT care from hospital to home; 3. OPAT care at home.

### 99 **Individual interviews**

100 Patients' perceptions of care can differ from those of their informal caregivers. To explore these  
101 differences, we held individual interviews with informal caregivers for further exploration of the  
102 Picker principle 'involvement of family and friends'.<sup>13</sup> Focus group candidates were asked whether a  
103 relative was closely involved with OPAT care and would agree to participate in an interview.

104 The interview guide was based on the 8 Picker principles of patient-centered care and adjusted to  
105 the role of the relative.

### 107 **Ethics approval**

108 All participants received written information about the project and its aims, and were subsequently  
109 invited to participate. We stressed that participation in this study was voluntary and withdrawal from  
110 the study was possible at any time. The anonymity of participants was maintained in the interview

1  
2  
3 111 transcripts. Written informed consent was obtained from all participants. The Regional Review Board  
4 112 for Human Research, Arnhem-Nijmegen (CMO no. 2016-3107) assessed the study, and judged that  
5  
6 113 ethics approval was not required under Dutch National Law.  
7  
8 114

9 115 **Data analysis**

10  
11 116 The focus groups and interviews were recorded with a digital voice recorder and transcribed  
12  
13 117 verbatim by an independent transcriber. The transcripts were analysed using a thematic content  
14  
15 118 analysis approach with the qualitative software programme Atlas.ti. To increase inter-coder  
16  
17 119 reliability, the researcher and the moderator independently coded all transcripts. Any discrepancies  
18  
19 120 in the analysis were discussed until consensus was reached.  
20  
21 121

1  
2  
3 122 **RESULTS**

4 123 *Study population*

5  
6 124 We conducted 3 focus group interviews of 90-120 minutes each. A total of 18 patients intended to  
7 125 participate of whom 16 were present; 2 patients were unable to attend. Participant characteristics  
8 126 are listed in Table 1. We conducted 2 individual interviews with relatives: the son of a 86-year-old  
9 127 patient and the mother of a 22-year-old patient with a cognitive impairment.  
10  
11  
12

13  
14 129 *Initiation of OPAT*

15 130 All participants had been admitted to the hospital and had already received a course of intravenous  
16 131 antibiotics when the decision to continue treatment at home was made. Representative quotations  
17 132 related to the initiation phase are shown in Table 2.

18  
19 133 Virtually all participants indicated that the decision to initiate OPAT was made by the physician  
20 134 without involving the patient and their relatives. Some participants felt this violated their autonomy:  
21 135 *"You're still dealing with people and in this case, in my personal case, it was just like: 'We're doing it,*  
22 136 *period. You don't have any say.'"*

23  
24  
25 137 One patient stated that he would have preferred to stay in the hospital for the remaining days of  
26 138 therapy, had he been given that option.

27  
28 139 The insertion of an intravascular access device came as a surprise for some patients *"they don't*  
29 140 *explain the procedure at all, they just move you to the procedure room"*, others received written as  
30 141 well as oral information and were able to watch the insertion of the device on a monitor during the  
31 142 procedure. Not knowing what was going to happen made patients feel unsafe, anxious and  
32 143 uncertain.

33  
34 144 The type, amount, and quality of information provided about the entire OPAT process varied among  
35 145 the hospitals. Most patients indicated wanting more information about the antibiotics, the possible  
36 146 side effects and interactions. Sometimes, relatives participated in searching for information on the  
37 147 Internet. During the focus groups, the participants emphasized the importance of the presence of  
38 148 relatives during information sessions or patient-doctor conversations, which was supported by the  
39 149 informal caregivers.

40  
41 150 According to patients, important topics to be discussed, were potential antibiotic side effects and  
42 151 instructions for use, information about intravascular access devices, potential complications and how  
43 152 to handle problems or complications, and information about treatment progress. Participants agreed  
44 153 that both written and oral information should be given. Well-informed patients seemed to feel safe  
45 154 and secure, while a lack of information could lead to feelings of concern.  
46

47  
48  
49  
50  
51  
52  
53  
54  
55  
56 156 *Transition of care from hospital to home*  
57  
58



1  
2  
3 157 For this phase of OPAT care, vast differences between hospitals were found. In one hospital, the  
4 158 transition of OPAT was said to be delayed quite often. Lack of a responsible person and lack of  
5 159 collaboration between the disciplines involved was the main reason according to the patients. The  
6 160 additional admission days lead to feelings of uselessness and wasting money and resources: *"I was*  
7 161 *just lying there for no reason at all, I wasn't sick or anything. Well, then I can't stand being in a*  
8 162 *hospital, when I'm just waiting for the doctor all day."* (Table 3). Sometimes, discharge was  
9 163 postponed by several hours because of a delay in antibiotic preparation by the pharmacist. As long as  
10 164 patients were informed about the reasons of this delay, this was not seen as a major problem.  
11 165 In another hospital, patients were well-prepared for discharge and knew what to expect at home. An  
12 166 employee of the home care team visited the patients and assisted with the transition of care by  
13 167 providing information, a 'starter package' (containing bandages, needles, fluids for infusion), and  
14 168 explaining the course of treatment after discharge.  
15 169 An ongoing collaboration between the referring physician, the pharmacy, and the home care team  
16 170 was seen as a prerequisite for successful care transition. Some patients emphasized the lack of an  
17 171 OPAT expert who is responsible and coordinates care transition. According to those patients, the  
18 172 presence of an OPAT expert would really improve the quality of care, and would made them feel  
19 173 secure.

#### 174 175 *OPAT care at home*

176 The majority of patients were very positive regarding the therapy at home, especially regarding the  
177 nurses of the home care team (Table 4). Patients appreciated their professionalism: a uniform and  
178 hygienic manner of working made them feel safe and secure. Additionally, participants valued  
179 nurses' attentiveness to both the patient's and family's emotional needs – showing compassion  
180 through not only attaching the antibiotic device, but by holistic nursing: *"I feel that I have a doctor*  
181 *who is at my bedside every day."*  
182 All patients were provided with instructions regarding how to act in case of complications.  
183 Complications most frequently mentioned were related to the intravascular access device  
184 (obstruction, dislocation or bleeding). In those cases, patients had immediate access to care through  
185 the hospital's emergency department – patients appreciated this prudent policy of *"better to be safe*  
186 *than sorry"*. Questions regarding the antibiotics were settled less appropriately. Contradictory  
187 information was a source of great frustration, for example when questions arose regarding the  
188 amount of antibiotics that remained in the elastomeric pumps. Patients felt indignant that nobody  
189 was able to provide a definitive answer to their questions.

#### 190 191 *Advantages and disadvantages of OPAT*

1  
2  
3 192 The main advantage of OPAT was the possibility to go home, feelings of freedom, and a faster  
4 193 recovery compared to extended admission at the hospital. Adapting the visiting hours of the care  
5  
6 194 provider to the patient's schedules was often mentioned a prerequisite. Most patients wanted to  
7  
8 195 participate in social activities (e.g. a birthday party) and appreciated the flexibility of care providers.  
9  
10 196 However, OPAT was considered an impairment too: both physically due to the device and the  
11  
12 197 intravenous catheter (which hindered showering, walking, sleeping), and due to the impact on  
13  
14 198 privacy and personal time: *"But I have a life too, a private life. OPAT is not only about antibiotics".*  
15  
16 199 Another patient stated: *"It is an invasion of privacy"*. The impact of this impairment was different for  
17  
18 200 distinct types of patients. Patients who received continuous infusion of antibiotics generally felt more  
19  
20 201 impaired compared to those receiving a single daily administration. Tiredness was often mentioned  
21  
22 202 as a hindrance for participating in social activities. For people without mobility limitations due to  
23  
24 203 their underlying illness, OPAT negatively impacted their freedom, while people who were already  
25  
26 204 limited in their mobility (e.g. joint prosthesis infection) did not experience OPAT as a substantial  
27  
28 205 additional freedom impairment. Some patients also received home care for help with daily living  
29  
30 206 activities, in addition to the specialist nurse who attached the antibiotic device. *"At a certain*  
31  
32 207 *moment, I had 3 people around: first home care came to help with showering, then at 8.30am the*  
33  
34 208 *cleaner visited me, and thereafter the OPAT nurse."*  
35  
36  
37  
38  
39  
40  
41  
42  
43  
44  
45  
46  
47  
48  
49  
50  
51  
52  
53  
54  
55  
56  
57  
58  
59  
60

1  
2  
3 210 **DISCUSSION**

4 211 To our knowledge, this is the first study investigating patient-centeredness of OPAT care, based on  
5  
6 212 the experiences and preferences of patients and relatives. From our focus group interviews, two  
7  
8 213 central values emerged as essential constituents of patient-centered OPAT care: freedom and safety.  
9  
10 214 Different elements of the OPAT care process strengthen or undermine these values. These elements  
11  
12 215 provide clear keystones to improve patient-centeredness of OPAT care.

13 216 In the context of OPAT care, freedom involves the ability to live and make decisions about one's life  
14  
15 217 without being limited or restricted. A major advantage of OPAT care compared to in-hospital  
16  
17 218 antibiotic administration is the ability to leave the hospital and go home, to one's own familiar  
18  
19 219 environment, which greatly increases feelings of freedom. However, our findings indicate that  
20  
21 220 freedom is sometimes negatively influenced by behaviour of healthcare professionals involved and  
22  
23 221 by aspects beyond the direct control of these professionals (i.e., organisational factors). In many  
24  
25 222 cases, it is the sensation of losing control of a situation that leads to a reduced sense of freedom. For  
26  
27 223 example, participants described how multiple specialist nurse visits a day reduced their sense of  
28  
29 224 privacy and control, as they had to schedule their day around these visits. Disease or therapy related  
30  
31 225 symptoms, such as fatigue and the physical presence of the Peripherally Inserted Central Catheter  
32  
33 226 (PICC) restricted participants' freedom too, as they were limited in activities such as showering and  
34  
35 227 attending social functions.

36 228 Knowing that freedom is a core value for our participants, it was remarkable that decisions  
37  
38 229 concerning the initiation of OPAT, hospital discharge, the choice of home care organisation, and  
39  
40 230 scheduling time of antibiotic administration were often made by healthcare providers without input  
41  
42 231 from the patient or carers. Other authors have also observed this lack of shared decision-making:  
43  
44 232 that decisions *about* the patient are not always made *with* the patient.<sup>14</sup> This is an important area for  
45  
46 233 improvement, as previous studies demonstrated that when providers, patients and family members  
47  
48 234 work together, the patient-centeredness and quality of care increases.<sup>15</sup>

49 235 The second central value, safety, means feeling free from danger or harm. Patients receiving OPAT  
50  
51 236 have an invasive infection which may cause serious harm and is potentially fatal. Participants  
52  
53 237 described decreased trust in their bodies and worried about their well-being. Contradictory  
54  
55 238 information, difficulty accessing appropriate expertise and care when encountering problems, and  
56  
57 239 professionals not following hygiene guidelines, further contributed to these feelings of insecurity.  
58  
59 240 One participant poignantly described the importance of trustworthy care and healthcare  
60  
241 professionals in this context: *"For me [...] the PICC line is a lifeline. There is no alternative. I cannot*

1  
2  
3 242 *have another surgery, because my odds of survival are three percent. So this is literally and*  
4 243 *figuratively my lifeline... Because I have a bacterium somewhere and if it becomes active, it's over."*  
5

6 244 In line with the good practice recommendations for OPAT <sup>2</sup>, participants expressed the need for a  
7 245 medical lead, someone who is and feels responsible for OPAT care. Elements that inspire trust and  
8 246 contribute to a feeling of safety are clear and unambiguous communication and information,  
9 247 frequent feedback about treatment progress, and direct accessibility of hospital care if needed.  
10 248 Additionally, the confident and compassionate care of the specialist nurse at home was often  
11 249 emphasized as a major contribution to feelings of safety.

### 16 250 *Strengths and limitations*

17 251 OPAT has been used for over 40 years and a wealth of evidence has accumulated supporting its  
18 252 clinical justification and cost-effectiveness. This is the first study that reported on patients'  
19 253 experiences and perspectives, and focused on quality of care instead of quality of life. Our study  
20 254 considered all 8 Picker principles of patient-centered care through a qualitative approach, which  
21 255 provides a more holistic view of patient experiences than previous quality of life studies.<sup>16</sup>

22 256 Although a qualitative study carries the risk of eliciting socially desirable responses from participants,  
23 257 we have reduced this risk by asking participants to describe their experiences rather than merely  
24 258 assessing their satisfaction<sup>17</sup>, by using trained and experienced qualitative researchers to perform  
25 259 data collection and analysis, and by conducting multiple focus groups in different settings. We  
26 260 included a diverse and representative study population through purposive sampling.<sup>18</sup>

27 261 Currently, the Netherlands only uses one model of OPAT delivery: the administration by a visiting  
28 262 specialist nurse. The impact of other models, such as administration by a visiting general nurse or  
29 263 outpatient attendance at a healthcare facility were not investigated in this study. Nevertheless we  
30 264 believe that our results are also applicable to other settings, as in all models treatment is organized  
31 265 from an outpatient setting with the patient residing at home. Furthermore, our results are in line  
32 266 with the findings of recent qualitative research to the different OPAT services provided in Northern  
33 267 England.<sup>19</sup> Confidence in OPAT care appeared to be a major determinant of the feelings of safety.

### 34 268 *Conclusions*

35 269 This study has increased our understanding of the patient-centeredness of OPAT care. The focus  
36 270 group interviews provided valuable insights into the needs, and preferences of patients who receive  
37 271 OPAT. We have shown that keystones in improving the patient-centeredness of OPAT care are

1  
2  
3  
4  
5  
6  
7  
8  
9  
10  
11  
12  
13  
14  
15  
16  
17  
18  
19  
20  
21  
22  
23  
24  
25  
26  
27  
28  
29  
30  
31  
32  
33  
34  
35  
36  
37  
38  
39  
40  
41  
42  
43  
44  
45  
46  
47  
48  
49  
50  
51  
52  
53  
54  
55  
56  
57  
58  
59  
60

272 focusing on elements that enhance patients’ feelings of freedom and safety. Future interventions  
273 directed at the patient-centeredness of OPAT care should focus on these elements.  
274

For peer review only

275 **REFERENCES**

- 276 **1** Tice AD, Rehm SJ, Dalovisio JR, et al. Practice guidelines for outpatient parenteral  
277 antimicrobial therapy. IDSA guidelines. *Clin Infect Dis*. 2004;**38**(12):1651-72.
- 278 **2** Chapman AL, Seaton RA, Cooper MA, et al. Good practice recommendations for outpatient  
279 parenteral antimicrobial therapy (OPAT) in adults in the UK: a consensus statement. *J Antimicrob*  
280 *Chemother*. 2012;**67**(5):1053-62.
- 281 **3** Institute of Medicine Committee on Quality of Health Care in A. Crossing the Quality Chasm:  
282 A New Health System for the 21st Century. Washington (DC): National Academies Press (US)  
283 Copyright 2001 by the National Academy of Sciences. All rights reserved.; 2001.
- 284 **4** Rathert C, Williams ES, McCaughey D, Ishqaidef G. Patient perceptions of patient-centred  
285 care: empirical test of a theoretical model. *Health Expect*. 2015;**18**(2):199-209.
- 286 **5** Wolter JM, Bowler SD, Nolan PJ, McCormack JG. Home intravenous therapy in cystic fibrosis:  
287 a prospective randomized trial examining clinical, quality of life and cost aspects. *Eur Respir J*.  
288 1997;**10**(4):896-900.
- 289 **6** Lemelin J, Hogg WE, Dahrouge S, et al. Patient, informal caregiver and care provider  
290 acceptance of a hospital in the home program in Ontario, Canada. *BMC Health Serv Res*. 2007;**7**:130.
- 291 **7** Al Ansari A, Al Alawi S, Al Qahtani M, Darwish A. Outpatient parenteral antimicrobial therapy  
292 (OPAT) in the kingdom of bahrain: Efficacy, patient satisfaction and cost effectiveness. *Open*  
293 *Infectious Diseases Journal*. 2013;**7**(1):90-5.
- 294 **8** Elsey L. Service Evaluation of a Cystic Fibrosis Home Intravenous Antibiotic Service Provided  
295 by a Nhs Foundation Trust. *Arch Dis Child*. 2016;**101**(9):e2.
- 296 **9** Kupfer JM, Bond EU. Patient satisfaction and patient-centered care: necessary but not equal.  
297 *JAMA*. 2012;**308**(2):139-40.
- 298 **10** Seidman I. Interviewing as Qualitative Research: A Guide for Researchers in Education and  
299 the Social Sciences: Teachers College Press; 2006.
- 300 **11** Corbin JM, Strauss A. Grounded theory research: Procedures, canons, and evaluative criteria.  
301 *Qualitative Sociology*. 1990;**13**(1):3-21.
- 302 **12** Kitzinger J. Qualitative research. Introducing focus groups. *BMJ*. 1995;**311**(7000):299-302.
- 303 **13** Picker Institute. The eight Picker principles of patient centered care. Oxford: Picker Institute,  
304 2013.; Available at: <http://pickerinstitute.org>.
- 305 **14** Hesselink G, Flink M, Olsson M, et al. Are patients discharged with care? A qualitative study  
306 of perceptions and experiences of patients, family members and care providers. *BMJ quality &*  
307 *safety*. 2012;**21** Suppl 1:i39-49.
- 308 **15** Stewart M, Brown JB, Donner A, et al. The impact of patient-centered care on outcomes. *J*  
309 *Fam Pract*. 2000;**49**(9):796-804.

- 1  
2  
3 310 **16** Goodfellow AF, Wai AO, Frighetto L, et al. Quality-of-life assessment in an outpatient  
4 311 parenteral antibiotic program. *Ann Pharmacother.* 2002;**36**(12):1851-5.  
5  
6 312 **17** Coulter A, Cleary PD. Patients' experiences with hospital care in five countries. *Health Aff*  
7 313 *(Millwood)*. 2001;**20**(3):244-52.  
8  
9 314 **18** Guest G, Namey E, McKenna K. How Many Focus Groups Are Enough? Building an Evidence  
10 315 Base for Nonprobability Sample Sizes. *Field Method.* 2017;**29**(1):3-22.  
11  
12 316 **19** Twiddy M, Czoski Murray CJ, Mason SJ, et al. A qualitative study of patients' feedback about  
13 317 Outpatient Parenteral Antimicrobial Therapy (OPAT) services in Northern England: implications for  
14 318 service improvement. *BMJ open.* 2018;**8**(1):e019099.  
15  
16  
17  
18 319  
19 320  
20  
21  
22  
23  
24  
25  
26  
27  
28  
29  
30  
31  
32  
33  
34  
35  
36  
37  
38  
39  
40  
41  
42  
43  
44  
45  
46  
47  
48  
49  
50  
51  
52  
53  
54  
55  
56  
57  
58  
59  
60

321 **Box 1: Picker principles of patient centeredness**

- 322 • Access to care
- 323 • Information, communication and education
- 324 • Respect for patient values, preferences and needs
- 325 • Physical comfort
- 326 • Coordination and integration of care
- 327 • Emotional support and alleviation of fear and anxiety
- 328 • Involvement of family and friends
- 329 • Continuity and transition

331 **Table 1: characteristics of focus group participants**

|                           | Focus group participants (n=16) |
|---------------------------|---------------------------------|
| <b>Male (%)</b>           | 11 (69)                         |
| <b>Mean age (range)</b>   | 68 (47-85)                      |
| <b>Hospital type</b>      |                                 |
| University (%)            | 5 (31)                          |
| Teaching (%)              | 5 (31)                          |
| Tertiary center (%)       | 6 (38)                          |
| <b>Focus of infection</b> |                                 |
| Joint prosthesis          | 8 (50)                          |
| Urinary tract             | 1 (6)                           |
| Vascular prosthesis       | 5 (31)                          |
| Endocarditis              | 2 (13)                          |
| <b>Treatment duration</b> |                                 |
| 0-2 weeks                 | 2 (13)                          |
| 2-6 weeks                 | 4 (25)                          |
| 6-12 weeks                | 4 (25)                          |
| >12 weeks                 | 6 (38)                          |

332

333

334

335

336



337 **Table 2: Quotes related to the initiation phase of OPAT**

| Picker principle                  | Representative quotes                                                                                                                                                                                                                                                                                                                                                                                                            |
|-----------------------------------|----------------------------------------------------------------------------------------------------------------------------------------------------------------------------------------------------------------------------------------------------------------------------------------------------------------------------------------------------------------------------------------------------------------------------------|
| Respect                           | But in such a case, I'd like to see that there is a choice. That it's explained as, 'This is what we want to do. What do you think?' Not: 'This is what we're going to do. Period.'                                                                                                                                                                                                                                              |
| Emotional support                 | That was because I was at my wits' end, the nursing staff themselves arranged to get me an antibiotic device so that I could at least go home on the Sunday afternoon. For a little while.                                                                                                                                                                                                                                       |
| Information                       | At one point I was rolled away and a PICC was placed. I thought, 'What's going on? They could explain a little about how and what?' But they didn't.                                                                                                                                                                                                                                                                             |
| Coordination                      | Yes, I had the impression that it ( <i>OPAT</i> ) was hardly ever done in the urology department. Because the doctors, the medical specialists, who... They all tell you something different. Look. If it has occurred more often, and if it has happened to a patient more often, then they start telling you everything all at once...                                                                                         |
| Involvement of family and friends | My husband came to visit me every morning at nine thirty because that's when they came round, uh, the doctors and so on. But things just went right over my head, just like that, and then he had stored it all up, and that was certainly important.                                                                                                                                                                            |
| Involvement of family and friends | If a patient is competent in making decisions, as my father is, then I think if he knows things himself and can tell you, fine, but we must remember that my father is 85, and he can sometimes forget something. So it is always convenient to have an informal caregiver present who can translate that into what is essential, what's coming our way, and in the current trajectory, what is the best method to deal with it? |

338

339

340 **Table 3: Quotes related to the transition phase of OPAT**

| Picker principle          | Representative quotes                                                                                                                                                                                                                                                                                                                                                                                                                                                                               |
|---------------------------|-----------------------------------------------------------------------------------------------------------------------------------------------------------------------------------------------------------------------------------------------------------------------------------------------------------------------------------------------------------------------------------------------------------------------------------------------------------------------------------------------------|
| Respect                   | The only thing I had great difficulty with was that actually – yes, nothing against their home care organisation- but that they were forced on me somewhat. At a certain point I said, ‘I have my own home care organisation.’ ‘No, we have contracts with a specific one.’ I thought that in fact the patient still decides who does or does not come to his home.                                                                                                                                 |
| Information               | But if someone comes to me now ‘I have to go home tomorrow and I’m getting a PICC’, then I would just tell him what a day looked like for me. That’s different for everyone personally.                                                                                                                                                                                                                                                                                                             |
| Coordination              | What also is a very big point, in my opinion, in terms of communication here, is that the first time I was to go home, it didn’t happen. It appears that they had said in the department, ‘You can go home with this antibiotic.’ They had not taken this into account in the department: 3 days go by after they send off the application before they process it here and have the medicines ready. Three days in between, and they had forgotten that. – Forgotten, well, they did not know that. |
| Continuity and transition | They said that I could go home Tuesday, and then it was Friday because the antibiotic was not ready and so on, uhm.                                                                                                                                                                                                                                                                                                                                                                                 |
| Continuity and transition | It went pretty smoothly for me. They said to me on Thursday, ‘We’ll place a PICC for you.’ That was done on Friday, and then they came to tell me, ‘Tomorrow the Home Care will be there.’ That was all very well arranged.                                                                                                                                                                                                                                                                         |
| Physical comfort          | Medication was administered continuously through the PICC for 6 weeks in the hospital, and now it’s once a day, so this is just great for me. I’m also enjoying life. I am very happy.                                                                                                                                                                                                                                                                                                              |

341

342

343 **Table 4: Quotes related to OPAT care at home**

| Picker principle          | Representative quotes                                                                                                                                                                                                                                                                                                                                                                                                                                                                       |
|---------------------------|---------------------------------------------------------------------------------------------------------------------------------------------------------------------------------------------------------------------------------------------------------------------------------------------------------------------------------------------------------------------------------------------------------------------------------------------------------------------------------------------|
| Access to care            | But you can also contact Home Care 24/7. I liked that.                                                                                                                                                                                                                                                                                                                                                                                                                                      |
| Respect                   | They have experienced nurses, which is very enjoyable. I feel that I have a doctor who checks everything completely and who is at my bedside every day.                                                                                                                                                                                                                                                                                                                                     |
| Respect                   | <p><i>Interviewer:</i> What makes a really a nice home care nurse? A nurse who makes you think: those are the qualities that someone must have, or you think, 'I feel I can really depend on them.'</p> <p><i>Patient 1:</i> Have time for you, that you can tell your story.</p> <p><i>Patient 2:</i> Then we come back to that word, you know: human.</p> <p><i>Patient 3:</i> Not only to connect that thing and get out, but there were also some who sat down to eat at the table.</p> |
| Emotional support         | You have to... you're stuck with it every day. You eat beforehand, you make sure you tidy up a little and things like that, so you really have no vacation at all nor any rest of your own, not really.                                                                                                                                                                                                                                                                                     |
| Emotional support         | They say, 'You are free.' But you're not at all. Two hours beforehand you have to take the stuff out of the fridge, they come sometime between 8 and 10 in the morning, so that's 4 hours, and they do that twice a day, so that's 8 hours a day, 8 of the 14 hours that you're up. Then you have little time left for yourself. Look, for a very long period, like months on end, super. Then it's a super system, but not for a period of ... yes, 6 days in my case.                     |
| Emotional support         | I said this week to my specialist, in my personal case, then, 'Behind every door you expect an exit, but there is another door and yet another door.'                                                                                                                                                                                                                                                                                                                                       |
| Information               | I have not been told anything at all and I am a somewhat surprised, because I do not know how it will turn out. I had expected that at least an interim balance would be drawn up. Something like: 'How are we doing?'                                                                                                                                                                                                                                                                      |
| Continuity and transition | Of course I had to deal with planning for the therapy at the hospital and consequently had to deal with the taxi company and with the Home Care. That was all rather difficult, especially the first few weeks. Things went wrong a number of times. If the first domino falls the wrong way, then the planning for the rest of the day falls apart.                                                                                                                                        |
| Involvement of family and | <i>Interviewer:</i> Are there other things that people should know when they go home and administer this type of antibiotic at home?                                                                                                                                                                                                                                                                                                                                                        |

|                  |                                                                                                                                                                                                                                                                                                                                         |
|------------------|-----------------------------------------------------------------------------------------------------------------------------------------------------------------------------------------------------------------------------------------------------------------------------------------------------------------------------------------|
| friends          | F1P3: No. At least, I'll just have a look, in my case, because I am younger than all of you: warn people, bear in mind that it is also a violation of your privacy. Especially if you have children who live at home. The time will come when they start saying, 'Is Home Care here again??' So it does have an impact on your privacy. |
| Physical comfort | I only had Home Care for a few weeks, but I would have liked to have had it longer. A year on clindamycin; I have had more problems with that than with the PICC.                                                                                                                                                                       |

344

For peer review only

1  
2  
3 345 **DECLARATION OF INTERESTS**

4  
5 346 The authors declare that they have no competing interests.

6  
7 347 **ACKNOWLEDGEMENTS**

8  
9 348 We are grateful to those interviewed for their generous participation, and to dr. T. Sprong, dr. D.  
10  
11 349 Telgt, dr. F. Vos, ms. H. De Gouw, dr. M. Dautzenberg for facilitating the performance of the study.

12  
13 350 **FUNDING**

14  
15 351 This research received no specific grant from any funding agency in the public, commercial or not-  
16  
17 352 for-profit sectors

18  
19 353 **AUTHOR'S CONTRIBUTION**

20  
21 354 MB, AO, JS, and MH conceived the study. MB and AO performed the data collection. MB, AO, and  
22  
23 355 MH analysed and managed the data, including quality control. MT, BJK, and JtO advised on study  
24  
25 356 design and reviewed the manuscript. MB and AO drafted the manuscript, all authors contributed  
26  
27 357 substantially to its revision. MB takes responsibility for the paper as a whole.

# Reporting checklist for qualitative study.

Based on the SRQR guidelines.

## Instructions to authors

Complete this checklist by entering the page numbers from your manuscript where readers will find each of the items listed below.

Your article may not currently address all the items on the checklist. Please modify your text to include the missing information. If you are certain that an item does not apply, please write "n/a" and provide a short explanation.

Upload your completed checklist as an extra file when you submit to a journal.

In your methods section, say that you used the SRQR reporting guidelines, and cite them as:

O'Brien BC, Harris IB, Beckman TJ, Reed DA, Cook DA. Standards for reporting qualitative research: a synthesis of recommendations. *Acad Med.* 2014;89(9):1245-1251.

|                                            | Reporting Item                                                                                                                                                                                                                          | Page Number |
|--------------------------------------------|-----------------------------------------------------------------------------------------------------------------------------------------------------------------------------------------------------------------------------------------|-------------|
|                                            | #1 Concise description of the nature and topic of the study identifying the study as qualitative or indicating the approach (e.g. ethnography, grounded theory) or data collection methods (e.g. interview, focus group) is recommended | 1           |
|                                            | #2 Summary of the key elements of the study using the abstract format of the intended publication; typically includes background, purpose, methods, results and conclusions                                                             | 2           |
| Problem formulation                        | #3 Description and significance of the problem / phenomenon studied: review of relevant theory and empirical work; problem statement                                                                                                    | 3           |
| Purpose or research question               | #4 Purpose of the study and specific objectives or questions                                                                                                                                                                            | 3           |
| Qualitative approach and research paradigm | #5 Qualitative approach (e.g. ethnography, grounded theory, case study, phenomenology, narrative research) and                                                                                                                          | 4           |

guiding theory if appropriate; identifying the research paradigm (e.g. postpositivist, constructivist / interpretivist) is also recommended; rationale. The rationale should briefly discuss the justification for choosing that theory, approach, method or technique rather than other options available; the assumptions and limitations implicit in those choices and how those choices influence study conclusions and transferability. As appropriate the rationale for several items might be discussed together.

|    |                           |     |                                                              |       |
|----|---------------------------|-----|--------------------------------------------------------------|-------|
| 1  |                           |     |                                                              |       |
| 2  |                           |     |                                                              |       |
| 3  |                           |     |                                                              |       |
| 4  |                           |     |                                                              |       |
| 5  |                           |     |                                                              |       |
| 6  |                           |     |                                                              |       |
| 7  |                           |     |                                                              |       |
| 8  |                           |     |                                                              |       |
| 9  |                           |     |                                                              |       |
| 10 |                           |     |                                                              |       |
| 11 |                           |     |                                                              |       |
| 12 |                           |     |                                                              |       |
| 13 |                           |     |                                                              |       |
| 14 | Researcher                | #6  | Researchers' characteristics that may influence the          | 4     |
| 15 | characteristics and       |     | research, including personal attributes, qualifications /    |       |
| 16 | reflexivity               |     | experience, relationship with participants, assumptions      |       |
| 17 |                           |     | and / or presuppositions; potential or actual interaction    |       |
| 18 |                           |     | between researchers' characteristics and the research        |       |
| 19 |                           |     | questions, approach, methods, results and / or               |       |
| 20 |                           |     | transferability                                              |       |
| 21 |                           |     |                                                              |       |
| 22 |                           |     |                                                              |       |
| 23 |                           |     |                                                              |       |
| 24 |                           |     |                                                              |       |
| 25 | Context                   | #7  | Setting / site and salient contextual factors; rationale     | 4     |
| 26 |                           |     |                                                              |       |
| 27 |                           |     |                                                              |       |
| 28 | Sampling strategy         | #8  | How and why research participants, documents, or             | 4     |
| 29 |                           |     | events were selected; criteria for deciding when no          |       |
| 30 |                           |     | further sampling was necessary (e.g. sampling                |       |
| 31 |                           |     | saturation); rationale                                       |       |
| 32 |                           |     |                                                              |       |
| 33 |                           |     |                                                              |       |
| 34 |                           |     |                                                              |       |
| 35 | Ethical issues pertaining | #9  | Documentation of approval by an appropriate ethics           | 4-5   |
| 36 | to human subjects         |     | review board and participant consent, or explanation for     |       |
| 37 |                           |     | lack thereof; other confidentiality and data security issues |       |
| 38 |                           |     |                                                              |       |
| 39 |                           |     |                                                              |       |
| 40 | Data collection methods   | #10 | Types of data collected; details of data collection          | 4     |
| 41 |                           |     | procedures including (as appropriate) start and stop         |       |
| 42 |                           |     | dates of data collection and analysis, iterative process,    |       |
| 43 |                           |     | triangulation of sources / methods, and modification of      |       |
| 44 |                           |     | procedures in response to evolving study findings;           |       |
| 45 |                           |     | rationale                                                    |       |
| 46 |                           |     |                                                              |       |
| 47 |                           |     |                                                              |       |
| 48 |                           |     |                                                              |       |
| 49 |                           |     |                                                              |       |
| 50 | Data collection           | #11 | Description of instruments (e.g. interview guides,           | 5     |
| 51 | instruments and           |     | questionnaires) and devices (e.g. audio recorders) used      |       |
| 52 | technologies              |     | for data collection; if / how the instruments(s) changed     |       |
| 53 |                           |     | over the course of the study                                 |       |
| 54 |                           |     |                                                              |       |
| 55 |                           |     |                                                              |       |
| 56 |                           |     |                                                              |       |
| 57 | Units of study            | #12 | Number and relevant characteristics of participants,         | 6, 14 |
| 58 |                           |     | documents, or events included in the study; level of         |       |
| 59 |                           |     |                                                              |       |
| 60 |                           |     |                                                              |       |

|    |                                                                                              |                                                                                                                                                                                                                                                                                                              |      |
|----|----------------------------------------------------------------------------------------------|--------------------------------------------------------------------------------------------------------------------------------------------------------------------------------------------------------------------------------------------------------------------------------------------------------------|------|
|    |                                                                                              | participation (could be reported in results)                                                                                                                                                                                                                                                                 |      |
| 1  |                                                                                              |                                                                                                                                                                                                                                                                                                              |      |
| 2  |                                                                                              |                                                                                                                                                                                                                                                                                                              |      |
| 3  | Data processing                                                                              | #13 Methods for processing data prior to and during analysis, including transcription, data entry, data management and security, verification of data integrity, data coding, and anonymisation / deidentification of excerpts                                                                               | 5    |
| 4  |                                                                                              |                                                                                                                                                                                                                                                                                                              |      |
| 5  |                                                                                              |                                                                                                                                                                                                                                                                                                              |      |
| 6  |                                                                                              |                                                                                                                                                                                                                                                                                                              |      |
| 7  |                                                                                              |                                                                                                                                                                                                                                                                                                              |      |
| 8  |                                                                                              |                                                                                                                                                                                                                                                                                                              |      |
| 9  | Data analysis                                                                                | #14 Process by which inferences, themes, etc. were identified and developed, including the researchers involved in data analysis; usually references a specific paradigm or approach; rationale                                                                                                              | 5    |
| 10 |                                                                                              |                                                                                                                                                                                                                                                                                                              |      |
| 11 |                                                                                              |                                                                                                                                                                                                                                                                                                              |      |
| 12 |                                                                                              |                                                                                                                                                                                                                                                                                                              |      |
| 13 |                                                                                              |                                                                                                                                                                                                                                                                                                              |      |
| 14 |                                                                                              |                                                                                                                                                                                                                                                                                                              |      |
| 15 |                                                                                              |                                                                                                                                                                                                                                                                                                              |      |
| 16 | Techniques to enhance trustworthiness                                                        | #15 Techniques to enhance trustworthiness and credibility of data analysis (e.g. member checking, audit trail, triangulation); rationale                                                                                                                                                                     | 5    |
| 17 |                                                                                              |                                                                                                                                                                                                                                                                                                              |      |
| 18 |                                                                                              |                                                                                                                                                                                                                                                                                                              |      |
| 19 |                                                                                              |                                                                                                                                                                                                                                                                                                              |      |
| 20 |                                                                                              |                                                                                                                                                                                                                                                                                                              |      |
| 21 | Syntheses and interpretation                                                                 | #16 Main findings (e.g. interpretations, inferences, and themes); might include development of a theory or model, or integration with prior research or theory                                                                                                                                               | 6-8  |
| 22 |                                                                                              |                                                                                                                                                                                                                                                                                                              |      |
| 23 |                                                                                              |                                                                                                                                                                                                                                                                                                              |      |
| 24 |                                                                                              |                                                                                                                                                                                                                                                                                                              |      |
| 25 |                                                                                              |                                                                                                                                                                                                                                                                                                              |      |
| 26 |                                                                                              |                                                                                                                                                                                                                                                                                                              |      |
| 27 | Links to empirical data                                                                      | #17 Evidence (e.g. quotes, field notes, text excerpts, photographs) to substantiate analytic findings                                                                                                                                                                                                        | 6,7  |
| 28 |                                                                                              |                                                                                                                                                                                                                                                                                                              |      |
| 29 |                                                                                              |                                                                                                                                                                                                                                                                                                              |      |
| 30 |                                                                                              |                                                                                                                                                                                                                                                                                                              |      |
| 31 | Intergration with prior work, implications, transferability and contribution(s) to the field | #18 Short summary of main findings; explanation of how findings and conclusions connect to, support, elaborate on, or challenge conclusions of earlier scholarship; discussion of scope of application / generalizability; identification of unique contributions(s) to scholarship in a discipline or field | 9,10 |
| 32 |                                                                                              |                                                                                                                                                                                                                                                                                                              |      |
| 33 |                                                                                              |                                                                                                                                                                                                                                                                                                              |      |
| 34 |                                                                                              |                                                                                                                                                                                                                                                                                                              |      |
| 35 |                                                                                              |                                                                                                                                                                                                                                                                                                              |      |
| 36 |                                                                                              |                                                                                                                                                                                                                                                                                                              |      |
| 37 |                                                                                              |                                                                                                                                                                                                                                                                                                              |      |
| 38 |                                                                                              |                                                                                                                                                                                                                                                                                                              |      |
| 39 |                                                                                              |                                                                                                                                                                                                                                                                                                              |      |
| 40 | Limitations                                                                                  | #19 Trustworthiness and limitations of findings                                                                                                                                                                                                                                                              | 10   |
| 41 |                                                                                              |                                                                                                                                                                                                                                                                                                              |      |
| 42 |                                                                                              |                                                                                                                                                                                                                                                                                                              |      |
| 43 | Conflicts of interest                                                                        | #20 Potential sources of influence of perceived influence on study conduct and conclusions; how these were managed                                                                                                                                                                                           | 19   |
| 44 |                                                                                              |                                                                                                                                                                                                                                                                                                              |      |
| 45 |                                                                                              |                                                                                                                                                                                                                                                                                                              |      |
| 46 |                                                                                              |                                                                                                                                                                                                                                                                                                              |      |
| 47 |                                                                                              |                                                                                                                                                                                                                                                                                                              |      |
| 48 | Funding                                                                                      | #21 Sources of funding and other support; role of funders in data collection, interpretation and reporting                                                                                                                                                                                                   | 19   |
| 49 |                                                                                              |                                                                                                                                                                                                                                                                                                              |      |
| 50 |                                                                                              |                                                                                                                                                                                                                                                                                                              |      |

The SRQR checklist is distributed with permission of Wolters Kluwer © 2014 by the Association of American Medical Colleges. This checklist was completed on 30. May 2018 using <http://www.goodreports.org/>, a tool made by the [EQUATOR Network](#) in collaboration with [Penelope.ai](#)



# BMJ Open

## Quality of outpatient parenteral antimicrobial therapy (OPAT) care from the patient's perspective: a qualitative study

|                                 |                                                                                                                                                                                                                                                                                                                                                                                         |
|---------------------------------|-----------------------------------------------------------------------------------------------------------------------------------------------------------------------------------------------------------------------------------------------------------------------------------------------------------------------------------------------------------------------------------------|
| Journal:                        | <i>BMJ Open</i>                                                                                                                                                                                                                                                                                                                                                                         |
| Manuscript ID                   | bmjopen-2018-024564.R1                                                                                                                                                                                                                                                                                                                                                                  |
| Article Type:                   | Research                                                                                                                                                                                                                                                                                                                                                                                |
| Date Submitted by the Author:   | 13-Aug-2018                                                                                                                                                                                                                                                                                                                                                                             |
| Complete List of Authors:       | Berrevoets, Marvin; Radboudumc, Infectious diseases<br>Oerlemans, Anke; Radboudumc, Infectious diseases<br>Tromp, Mirjam; Radboudumc, Infectious diseases<br>Kullberg, Bart Jan; Radboudumc, Infectious diseases<br>ten Oever, Jaap; Radboud University Nijmegen Medical Centre,<br>Schouten, Jeroen; Radboudumc, Infectious diseases<br>Hulscher, M; Radboud University Medical Center |
| <b>Primary Subject Heading</b>: | Infectious diseases                                                                                                                                                                                                                                                                                                                                                                     |
| Secondary Subject Heading:      | Patient-centred medicine, Qualitative research, Infectious diseases                                                                                                                                                                                                                                                                                                                     |
| Keywords:                       | OPAT, Outpatient Parenteral Antimicrobial Therapy, Patient Experiences, QUALITATIVE RESEARCH, patient-centeredness                                                                                                                                                                                                                                                                      |
|                                 |                                                                                                                                                                                                                                                                                                                                                                                         |

SCHOLARONE™  
Manuscripts

Only

1  
2  
3 1 **Quality of outpatient parenteral antimicrobial therapy (OPAT) care from the patient's perspective:**  
4 2 **a qualitative study**

5  
6 3 Marvin A.H. Berrevoets<sup>1,2\*</sup>, Anke J.M. Oerlemans<sup>2</sup>, Mirjam Tromp<sup>1</sup>, Bart Jan Kullberg<sup>1</sup>, Jaap ten  
7 4 Oever<sup>1</sup>, Jeroen A. Schouten<sup>1,2</sup>, Marlies E. Hulscher<sup>1,2</sup>  
8  
9

10 5  
11  
12 6 **Affiliations:**

13  
14 7 <sup>1</sup> Radboud Center for Infectious Diseases, Radboud university medical center, Nijmegen, the  
15 8 Netherlands

16  
17 9 <sup>2</sup>Scientific Center for Quality of Healthcare, Radboud Institute for Health Sciences, Radboud  
18 10 university medical center, Nijmegen, the Netherlands.  
19  
20

21 11  
22 12 \*Corresponding author:

23 13 Marvin A.H. Berrevoets, M.D.

24 14 Department of Internal Medicine and Infectious Diseases

25 15 P.O. box 9101, 6500 HB, Nijmegen, the Netherlands

26 16 E-mail: mberrevoets@gmail.com

27 17 Conflicts of interest: none

28 18 Word count: 3190 words  
29  
30

31 19  
32 20 **Running title:** Patients' perspectives on OPAT care  
33  
34  
35  
36  
37  
38  
39  
40  
41  
42  
43  
44  
45  
46  
47  
48  
49  
50  
51  
52  
53  
54  
55  
56  
57  
58  
59  
60

## 22 ABSTRACT

23 **Objectives:** Current outpatient parenteral antimicrobial therapy (OPAT) guidelines recommend  
24 delivering patient-centered care. However, little is known about what patients define as good quality  
25 of OPAT care and what their needs and preferences are.

26 The aim of this qualitative study is to explore the patients' perspective on high quality care, and to  
27 explore what patient-centered care means to adult OPAT patients.

28 **Design and setting:** This is an explorative, descriptive study using qualitative methods. We conducted  
29 focus group interviews with 16 adult patients (5 female, 11 male) from 3 different hospitals, who  
30 received OPAT, and 2 individual semi-structured interviews with their informal caregivers in the  
31 Netherlands. We used purposive sampling to ensure diversity of participants. We used the 8 Picker  
32 principles of patient-centeredness to guide data collection and analysis.

33 **Results:** Participants reported several elements considered as important for patient-  
34 centered OPAT care, like patient involvement in the decision-making process, a  
35 responsible OPAT lead, intensive collaboration between all disciplines involved,  
36 information provision and adherence to hygiene guidelines. Two central dimensions  
37 emerged as essential constituents of patient-centered OPAT care: freedom and safety.  
38 Both are heavily influenced by the behaviours of healthcare professionals and by  
39 organisational aspects beyond the direct influence of these professionals.

40 **Conclusion:** This study provides insights into the needs and preferences of adult patients who receive  
41 OPAT care. Future interventions directed at the improvement of patient-centeredness of OPAT care  
42 should focus on elements that enhance patients' feelings of freedom and safety.

43  
44 **Keywords:** OPAT; Outpatient Parenteral Antimicrobial Therapy; Patient Experiences; Qualitative;  
45 patient-centeredness;

### 46 **Strength's and limitations of the study**

- 47 • This is the first study that explored the needs and preferences of adult patients who receive  
48 OPAT care based on the 8 Picker principles of patient-centeredness
- 49 • We recruited patients from three different hospitals and used purposive sampling for the  
50 selection of patients, which created a diverse study population.
- 51 • For all 8 Picker dimensions of patient-centered care views from participants were obtained
- 52 • Data saturation was reached, and in-depth interviewing was performed with 2 involved relatives  
53 to explore subdomains
- 54 • Only one OPAT care model (most prevalent in Dutch healthcare) was applicable to this study  
55 population

## 57 INTRODUCTION

58 Outpatient parenteral antimicrobial therapy (OPAT) is a treatment option that enables patients to  
59 receive parenteral antimicrobials at home, as an alternative to inpatient care. OPAT has been used  
60 for over 40 years, and a growing body of research supports its clinical applicability and cost-  
61 effectiveness. The primary goals of outpatient therapy programs are to allow patients to complete  
62 treatment safely and effectively in the comfort of their home or another outpatient site, and to avoid  
63 the potential inconveniences, complications, and expense of hospitalization.<sup>1</sup>

64 Current guidelines for OPAT recommend the provision of high quality, patient-centered care that is  
65 easily accessible.<sup>1,2</sup> The Institute of Medicine has defined patient-centered care as ‘providing care  
66 that is respectful of and responsive to individual patient preferences, needs and values, and ensuring  
67 that patient values guide all clinical decisions’.<sup>3</sup> There is a growing body of evidence that improving  
68 the patient-centeredness of care can lead to positive clinical outcomes for patients.<sup>4</sup>

69 In 1988, the Picker Institute defined the term “patient-centered care” to call attention to the need  
70 for clinicians, staff, and health care systems to shift their focus away from diseases and back to the  
71 patient and family.<sup>5</sup> Using a wide range of focus groups—recently discharged patients, family  
72 members, physicians and non-physician hospital staff—combined with a literature review, eight  
73 dimensions of patient-centeredness were identified, which represent the most important indicators  
74 of quality and safety from the perspective of patients: respect for the patient’s values, preferences,  
75 and expressed needs; coordinated and integrated care; clear, high-quality information and education  
76 for the patient and family; physical comfort, including pain management; emotional support and  
77 alleviation of fear and anxiety; involvement of family members and friends, as appropriate;  
78 continuity, including through care-site transitions; and access to care.<sup>5</sup>

79 Limited information about the patient-centeredness of current OPAT is available. Previous  
80 studies that focused on patient experiences and perceptions showed that the safety of treatment at  
81 home is of great importance for OPAT patients.<sup>6-9</sup> Several other factors were found to be important  
82 (such as clear communication, coordination and integration of medical care and respect for patient  
83 preferences) highly depending on the social and cultural background of patients. Those studies did  
84 not systematically assess all domains of patient-centeredness.

85 The aim of this study is to explore patients’ needs, and preferences for high quality OPAT care, and to  
86 explore what “patient-centered care” means to adult OPAT patients based on the 8 Picker principles  
87 of patient-centeredness.

1  
2  
3  
4  
5  
6  
7  
8  
9  
10  
11  
12  
13  
14  
15  
16  
17  
18  
19  
20  
21  
22  
23  
24  
25  
26  
27  
28  
29  
30  
31  
32  
33  
34  
35  
36  
37  
38  
39  
40  
41  
42  
43  
44  
45  
46  
47  
48  
49  
50  
51  
52  
53  
54  
55  
56  
57  
58  
59  
60

## 88 **Methods**

89 We conducted focus group interviews with patients to explore all relevant preferences, and needs  
90 for patient-centered care, and individual interviews with caregivers. All interviews took place in  
91 March-May 2017.

92

### 93 **Focus group interviews**

94 Recruitment for the focus group interviews took place in 3 Dutch hospitals: one university hospital,  
95 one non-university teaching hospital, and one tertiary care hospital that specialises in prosthetic joint  
96 infections. We selected patients who received  $\geq 2$  doses of intravenous antibiotics at home,  $\leq 3$   
97 months before the focus group meetings occurred. We used purposive sampling to ensure diversity  
98 of participants (i.e. age, gender, diagnosis, and treatment duration).<sup>10</sup>

99 Patients were invited to participate by their physician. Participants were informed by (e)mail about  
100 the study objectives, and subsequently asked to participate. The focus groups took place at the  
101 hospital where patients had been treated. The number of focus groups depended on the point of  
102 saturation, i.e. when no new information could be identified from the data.<sup>11</sup> We aimed for groups of  
103 four to eight participants.<sup>12</sup>

104 Focus group interviews were led by an experienced moderator (AO), in the presence of one  
105 researcher (MB). Both interviewers had no treatment relationship with any of the patients. Each  
106 focus group interview commenced by explaining the goal of the meeting, introducing the researchers  
107 and the group participants.

108 We used a semi-structured focus group guide, based on the 8 principles of patient-centered care  
109 (Box 1), defined by the Picker Institute<sup>5</sup>, and discussed the 3 phases of OPAT care: 1. Initiation of  
110 OPAT; 2. Transition of OPAT care from hospital to home; 3. OPAT care at home.

111

### 112 **Individual interviews**

113 Patients' perceptions of care can differ from those of their informal caregivers. To explore these  
114 differences, we held individual interviews with informal caregivers for further exploration of the  
115 Picker principle 'involvement of family and friends'.<sup>5</sup> Focus group candidates were asked whether a  
116 relative was closely involved with OPAT care and would agree to participate in an interview.

117 The interview guide was based on the 8 Picker principles of patient-centered care and adjusted to  
118 the role of the relative.

119

### 120 **Ethics approval**

1  
2  
3 121 All participants received written information about the project and its aims, and were subsequently  
4 122 invited to participate. We stressed that participation in this study was voluntary and withdrawal from  
5  
6 123 the study was possible at any time. The anonymity of participants was maintained in the interview  
7  
8 124 transcripts. Written informed consent was obtained from all participants. The Regional Review Board  
9  
10 125 for Human Research, Arnhem-Nijmegen (CMO no. 2016-3107) assessed the study, and judged that  
11  
12 126 ethics approval was not required under Dutch National Law.  
127

128

### 128 **Data analysis**

129 The focus groups and interviews were recorded with a digital voice recorder and transcribed  
130 verbatim by an independent transcriber. The transcripts were analysed using a thematic content  
131 analysis approach based on the 8 Picker principles with the qualitative software programme Atlas.ti.  
132 To increase inter-coder reliability, the researcher and the moderator independently coded all  
133 transcripts. Any discrepancies in the analysis were discussed until consensus was reached.

134 After reaching consensus at code level, two researchers together agreed on a provisional  
135 categorization and overarching themes. The categories and themes were subsequently presented to  
136 and discussed with a third researcher (MH). This deliberative process resulted in the analysis  
137 presented in the manuscript.

### 138 **Patient and public involvement**

139 Patients were not involved in the development of the research question, the design, recruitment or  
140 conduct of this study. The results of this study will be disseminated to interested study participants  
141 by e-mail.

142

1  
2  
3 143 **RESULTS**

4 144 *Study population*

5  
6 145 We conducted 3 focus group interviews of 90-120 minutes each. A total of 18 patients intended to  
7 146 participate of whom 16 were present. Participant characteristics are listed in Table 1. We conducted  
8  
9 147 2 individual interviews with relatives: the son of a 86-year-old patient and the mother of a 22-year-  
10 148 old patient with a cognitive impairment.

11  
12 149

13  
14 150 *Initiation of OPAT*

15 151 All participants had been admitted to the hospital and had already received a course of intravenous  
16 152 antibiotics when the decision to continue treatment at home was made. Representative quotations  
17 153 related to the initiation phase are shown in Table 2.

18  
19 154 Virtually all participants indicated that the decision to initiate OPAT was made by the physician  
20 155 without involving the patient and their relatives. Some participants felt this violated their autonomy:  
21 156 *"You're still dealing with people and in this case, in my personal case, it was just like: 'We're doing it,*  
22 157 *period. You don't have any say'" (male, 52yrs, <2 weeks).*

23  
24 158 One patient stated that he would have preferred to stay in the hospital for the remaining days of  
25 159 therapy, had he been given that option.

26  
27 160 The insertion of an intravascular access device came as a surprise for some patients *"they don't*  
28 161 *explain the procedure at all, they just move you to the procedure room" (female, 70 yrs, 7 weeks),*  
29 162 others received written as well as oral information and were able to watch the insertion of the device  
30 163 on a monitor during the procedure. Not knowing what was going to happen made patients feel  
31 164 unsafe, anxious and uncertain.

32  
33 165 The type, amount, and quality of information provided about the entire OPAT process varied among  
34 166 the hospitals (table 2). Most patients indicated they would have wanted more information about the  
35 167 antibiotics, the possible side effects and interactions. Sometimes, relatives participated in searching  
36 168 for information on the InternetPparticipants emphasized the importance of the presence of relatives  
37 169 during information sessions or patient-doctor conversations.

38  
39 170 According to patients, important topics to be discussed, were potential antibiotic side effects and  
40 171 instructions for use, information about intravascular access devices, potential complications and how  
41 172 to handle problems or complications, and information about treatment progress. Participants agreed  
42 173 that both written and oral information should be given. Well-informed patients seemed to feel safe  
43 174 and secure, while a lack of information could lead to feelings of concern.

44  
45 175

46  
47 176 *Transition of care from hospital to home*

1  
2  
3 177 For this phase of OPAT care, vast differences between hospitals were found. In one hospital, the  
4 178 transition of OPAT was said to be delayed quite often (see table 3 for representative quotes). Lack of  
5 179 a responsible person and lack of collaboration between the disciplines involved was the main reason  
6 180 according to the patients. The additional admission days lead to feelings of uselessness and wasting  
7 181 money and resources: *"I was just lying there for no reason at all, I wasn't sick or anything. Well, then*  
8 182 *I can't stand being in a hospital, when I'm just waiting for the doctor all day."* (Female, 71yrs, 6  
9 183 weeks) (Table 3). Sometimes, discharge was postponed by several hours because of a delay in  
10 184 antibiotic preparation by the pharmacist. As long as patients were informed about the reasons of this  
11 185 delay, this was not seen as a major problem.

12 186 In another hospital, patients were well-prepared for discharge and knew what to expect at home. An  
13 187 employee of the home care team visited the patients and assisted with the transition of care by  
14 188 providing information, a 'starter package' (containing bandages, needles, fluids for infusion), and  
15 189 explaining the course of treatment after discharge.

16 190 An ongoing collaboration between the referring physician, the pharmacy, and the home care team  
17 191 was seen as a prerequisite for successful care transition. Some patients emphasized the lack of an  
18 192 OPAT expert who is responsible and coordinates care transition. According to those patients, the  
19 193 presence of an OPAT expert would really improve the quality of care, and would made them feel  
20 194 secure.

21 195

### 22 196 *OPAT care at home*

23 197 The majority of patients were very positive regarding the therapy at home, especially regarding the  
24 198 nurses of the home care team (see table 4 for representative quotes). Patients appreciated their  
25 199 professionalism: a uniform and hygienic manner of working made them feel safe and secure.  
26 200 Additionally, participants valued nurses' attentiveness to both the patient's and family's emotional  
27 201 needs – showing compassion through not only attaching the antibiotic device, but by holistic nursing:  
28 202 *"I feel that I have a doctor who is at my bedside every day"* (male, 80yrs, 8 weeks).

29 203 All patients were provided with instructions regarding how to act in case of complications.

30 204 Complications most frequently mentioned were related to the intravascular access device  
31 205 (obstruction, dislocation or bleeding). In those cases, patients had immediate access to care through  
32 206 the hospital's emergency department – patients appreciated this prudent policy of *"better to be safe*  
33 207 *than sorry"* (female, 65yrs, 12 weeks). Questions regarding the antibiotics were settled less  
34 208 appropriately. Contradictory information was a source of great frustration, for example when  
35 209 questions arose regarding the amount of antibiotics that remained in the elastomeric pumps.  
36 210 Patients felt indignant that nobody was able to provide a definitive answer to their questions.



1  
2  
3 2114 212 *Advantages and disadvantages of OPAT*

5  
6 213 The main advantage of OPAT for most participants was the possibility to go home, feeling of  
7  
8 214 freedom, and a faster recovery compared to an extended hospital stay. Adapting the visiting hours of  
9  
10 215 the care provider to the patient's schedules was often mentioned as a prerequisite. Most patients  
11  
12 216 wanted to participate in social activities (e.g. a birthday party) and appreciated the flexibility of care  
13  
14 217 providers.

15  
16 218 However, OPAT was considered an impairment too: both physically due to the device and the  
17  
18 219 intravenous catheter (which hindered showering, walking, sleeping), and due to the impact on  
19  
20 220 privacy and personal time: *"But I have a life too, a private life. OPAT is not only about antibiotics"*  
21  
22 221 *(male, 47yrs, 57 weeks)*. Another patient stated: *"It is an invasion of privacy"* *(male, 52yrs, 1 week)*.

23  
24 222 The impact of this impairment was different for distinct types of patients. Patients who received  
25  
26 223 continuous infusion of antibiotics generally felt more impaired compared to those receiving a single  
27  
28 224 daily administration. Tiredness was often mentioned as a hindrance for participating in social  
29  
30 225 activities. For people without mobility limitations due to their underlying illness, OPAT negatively  
31  
32 226 impacted their freedom, while people who were already limited in their mobility (e.g. joint prosthesis  
33  
34 227 infection) did not experience OPAT as a substantial additional impairment of freedom. Some patients  
35  
36 228 also received home care for help with daily living activities, in addition to the specialist nurse who  
37  
38 229 attached the antibiotic device. *"At a certain moment, I had 3 people around: first home care came to*  
39  
40 230 *help with showering, then at 8.30am the cleaner visited me, and thereafter the OPAT nurse"* *(female,*  
41  
42 231 *70yrs, 7 weeks)*.

43  
44  
45  
46  
47  
48  
49  
50  
51  
52  
53  
54  
55  
56  
57  
58  
59  
60 232

233 **DISCUSSION**

234 In this study, we investigated the patient-centeredness of OPAT care, based on the experiences and  
235 preferences of patients and relatives. From our focus group interviews, two central values emerged  
236 as essential constituents of patient-centered OPAT care: freedom and safety. Different elements of  
237 the OPAT care process strengthen or undermine these values. These elements provide clear  
238 keystones to improve patient-centeredness of OPAT care. Our findings are in line with other  
239 qualitative studies addressing patients' perspectives on antibiotic therapy. Bamford et al showed that  
240 patients want to be more involved in the decision to continue antibiotics at home<sup>7</sup>. Furthermore, in  
241 their study population patients worried about the organization and safety of OPAT.

242 In the context of OPAT care, freedom involves the ability to live and make decisions about one's life  
243 without being limited or restricted. A major advantage of OPAT care compared to in-hospital  
244 antibiotic administration is the ability to leave the hospital and go home, to one's own familiar  
245 environment, which greatly increases feelings of freedom. However, our findings indicate that  
246 freedom is sometimes negatively influenced by behaviour of healthcare professionals involved and  
247 by aspects beyond the direct control of these professionals (i.e., organisational factors). In many  
248 cases, it is the sensation of losing control of a situation that leads to a reduced sense of freedom. For  
249 example, participants described how multiple specialist nurse visits a day reduced their sense of  
250 privacy and control, as they had to schedule their day around these visits. Disease or therapy related  
251 symptoms, such as fatigue and the physical presence of the Peripherally Inserted Central Catheter  
252 (PICC) restricted participants' freedom too, as they were limited in activities such as showering and  
253 attending social functions. We confirmed the findings by Lehoux et al<sup>8</sup>, who showed that OPAT  
254 patients tended to withdraw from social activities because of social stigmatization and technical  
255 barriers, furthermore daily activities were compromised due to technical factors of the equipment .

256 Knowing that freedom is a core value for our participants, it was remarkable that decisions  
257 concerning the initiation of OPAT, hospital discharge, the choice of home care organisation, and  
258 scheduling time of antibiotic administration were often made by healthcare providers without input  
259 from the patient or carers. Other authors have also observed this lack of shared decision-making:  
260 that decisions *about* the patient are not always made *with* the patient.<sup>13</sup> This is an important area for  
261 improvement, as previous studies demonstrated that when providers, patients and family members  
262 work together, the patient-centeredness and quality of care increases.<sup>14</sup>

263

1  
2  
3 264 The second central value, safety, means feeling free from danger or harm. Patients receiving OPAT  
4 265 have an invasive infection which may cause serious harm and is potentially fatal. Participants  
5 266 described decreased trust in their bodies and worried about their well-being. Contradictory  
6 267 information, difficulty accessing appropriate expertise and care when encountering problems, and  
7 268 professionals not following hygiene guidelines, further contributed to these feelings of insecurity.  
8  
9 269 Other studies also stressed the need for better communication about infection and treatment  
10 270 options in patients treated with antibiotics.<sup>6,7,9</sup> Recently, Twiddy et al. showed that many OPAT  
11 271 patients found looking after themselves more difficult than they had expected.<sup>6</sup> Good  
12 272 communication and information by medical staff is needed to create this (self)confidence.  
13  
14 273 One participant poignantly described the importance of trustworthy care and healthcare  
15 274 professionals in this context: *“For me [...] the PICC line is a lifeline. There is no alternative. I cannot*  
16 275 *have another surgery, because my odds of survival are three percent. So this is literally and*  
17 276 *figuratively my lifeline... Because I have a bacterium somewhere and if it becomes active, it’s over.”*  
18 277 *(male, 47yrs, 57 weeks).*  
19  
20 278 Self-administration could enhance feelings of autonomy and freedom. Self-administration has been  
21 279 found safe in small cohort studies.<sup>15-17</sup> Nevertheless, some patients in our study addressed the  
22 280 importance of a nurse specialist administering OPAT, and would not dare to deliver ‘life-saving  
23 281 treatment’ to themselves. Only one patient in our study (male patient, vascular prosthesis infection)  
24 282 participated in the self-administration model; he did not report any safety concerns during his  
25 283 treatment. Further studies should compare the different OPAT models in relation to patient-  
26 284 centeredness and outcomes.  
27  
28 285 In line with the good practice recommendations for OPAT<sup>2</sup>, participants expressed the need for a  
29 286 medical lead, someone who is and feels responsible for OPAT care. Elements that inspire trust and  
30 287 contribute to a feeling of safety are clear and unambiguous communication and information,  
31 288 frequent feedback about treatment progress, and direct accessibility of hospital care if needed.  
32 289 Additionally, the confident and compassionate care of the specialist nurse at home was often  
33 290 emphasized as a major contribution to feelings of safety.

### 291 *Strengths and limitations*

34 292 OPAT has been used for over 40 years and a wealth of evidence has accumulated supporting its  
35 293 clinical justification and cost-effectiveness. Our study considered all 8 Picker principles of patient-

1  
2  
3 294 centered care through a qualitative approach, which provides a more holistic view of patient  
4 295 experiences than previous quality of life studies.<sup>18</sup>  
5  
6  
7 296 Although a qualitative study carries the risk of eliciting socially desirable responses from participants,  
8 297 we have reduced this risk by asking participants to describe their experiences rather than merely  
9 298 assessing their satisfaction<sup>19</sup>, by using trained and experienced qualitative researchers to perform  
10 299 data collection and analysis, and by conducting multiple focus groups in different settings. We  
11 300 included a diverse and representative study population through purposive sampling.<sup>20</sup>  
12  
13  
14  
15 301 The absolute number of participants in our study was relatively small. However, when considering  
16 302 the labor-intensiveness of qualitative research and the suggested number of interviewees in the  
17 303 literature, the number of focus group participants was more than required<sup>20</sup>, furthermore, we  
18 304 reached the point of data saturation.  
19  
20  
21  
22 305 Currently, the Netherlands only uses one model of OPAT delivery: the administration by a visiting  
23 306 specialist nurse. The impact of other models, such as administration by a visiting general nurse or  
24 307 outpatient attendance at a healthcare facility were not investigated in this study. Nevertheless we  
25 308 believe that our results are also applicable to other settings, as in all models treatment is organized  
26 309 from an outpatient setting with the patient residing at home. Furthermore, our results are in line  
27 310 with the findings of recent qualitative research to the different OPAT services provided in Northern  
28 311 England.<sup>6</sup> Confidence in OPAT care appeared to be a major determinant of the feelings of safety.

### 312 *Conclusions*

313 This study has increased our understanding of the patient-centeredness of OPAT care. The focus  
314 group interviews provided valuable insights into the needs, and preferences of patients who receive  
315 OPAT. We have shown that keystones in improving the patient-centeredness of OPAT care are  
316 focusing on elements that enhance patients' feelings of freedom and safety. Future interventions  
317 directed at the patient-centeredness of OPAT care should focus on these elements.

318

## 319 REFERENCES

- 1 Tice AD, Rehm SJ, Dalovisio JR, et al. Practice guidelines for outpatient parenteral antimicrobial therapy. IDSA guidelines. *Clin Infect Dis*. 2004;38(12):1651-72.
- 2 Chapman AL, Seaton RA, Cooper MA, et al. Good practice recommendations for outpatient parenteral antimicrobial therapy (OPAT) in adults in the UK: a consensus statement. *J Antimicrob Chemother*. 2012;67(5):1053-62.
- 3 Institute of Medicine. Crossing the Quality Chasm. A new health system for the 21st century. Washington, DC: National Academy Press, 2001.
- 4 Rathert C, Williams ES, McCaughey D, Ishqaidif G. Patient perceptions of patient-centred care: empirical test of a theoretical model. *Health Expect*. 2015;18(2):199-209.
- 5 Picker Institute. The eight Picker principles of patient centered care. Oxford: Picker Institute, 2013. Available at <http://pickerinstitute.org> Last accessed 13 August 2018.
- 6 Twiddy M, Czoski Murray CJ, Mason SJ, et al. A qualitative study of patients' feedback about Outpatient Parenteral Antimicrobial Therapy (OPAT) services in Northern England: implications for service improvement. *BMJ open*. 2018;8(1):e019099.
- 7 Bamford KB, Desai M, Aruede MJ, Lawson W, Jacklin A, Franklin BD. Patients' views and experience of intravenous and oral antimicrobial therapy: room for change. *Injury*. 2011;42 Suppl 5:S24-7.
- 8 Lehoux P. Patients' perspectives on high-tech home care: a qualitative inquiry into the user-friendliness of four technologies. *BMC Health Serv Res*. 2004;4(1):28.
- 9 Zanichelli V, Monnier AA, Tebano G, et al. Views and experiences with regard to antibiotic use of hospitalized patients in five European countries: a qualitative descriptive study. *Clin Microbiol Infect*. 2018.
- 10 Seidman I. Interviewing as Qualitative Research: A Guide for Researchers in Education and the Social Sciences: Teachers College Press; 2006.
- 11 Corbin JM, Strauss A. Grounded theory research: Procedures, canons, and evaluative criteria. *Qualitative Sociology*. 1990;13(1):3-21.
- 12 Kitzinger J. Qualitative research. Introducing focus groups. *BMJ*. 1995;311(7000):299-302.
- 13 Hesselink G, Flink M, Olsson M, et al. Are patients discharged with care? A qualitative study of perceptions and experiences of patients, family members and care providers. *BMJ quality & safety*. 2012;21 Suppl 1:i39-49.
- 14 Stewart M, Brown JB, Donner A, et al. The impact of patient-centered care on outcomes. *J Fam Pract*. 2000;49(9):796-804.
- 15 Barr DA, Semple L, Seaton RA. Self-administration of outpatient parenteral antibiotic therapy and risk of catheter-related adverse events: a retrospective cohort study. *Eur J Clin Microbiol Infect Dis*. 2012;31(10):2611-9.
- 16 Eaves K, Thornton J, Chapman AL. Patient retention of training in self-administration of intravenous antibiotic therapy in an outpatient parenteral antibiotic therapy service. *J Clin Nurs*. 2014;23(9-10):1318-22.
- 17 Matthews PC, Conlon CP, Berendt AR, et al. Outpatient parenteral antimicrobial therapy (OPAT): is it safe for selected patients to self-administer at home? A retrospective analysis of a large cohort over 13 years. *J Antimicrob Chemother*. 2007;60(2):356-62.
- 18 Goodfellow AF, Wai AO, Frighetto L, et al. Quality-of-life assessment in an outpatient parenteral antibiotic program. *Ann Pharmacother*. 2002;36(12):1851-5.
- 19 Coulter A, Cleary PD. Patients' experiences with hospital care in five countries. *Health Aff (Millwood)*. 2001;20(3):244-52.
- 20 Guest G, Namey E, McKenna K. How Many Focus Groups Are Enough? Building an Evidence Base for Nonprobability Sample Sizes. *Field Method*. 2017;29(1):3-22.

366

367

368 **Box 1: Picker principles of patient centeredness**

- 369 • Access to care
- 370 • Information, communication and education
- 371 • Respect for patient values, preferences and needs
- 372 • Physical comfort
- 373 • Coordination and integration of care
- 374 • Emotional support and alleviation of fear and anxiety
- 375 • Involvement of family and friends
- 376 • Continuity and transition

378 **Table 1: characteristics of focus group participants**

|                           | Focus group participants (n=16) |
|---------------------------|---------------------------------|
| <b>Male (%)</b>           | 11 (69)                         |
| <b>Mean age (range)</b>   | 68 (47-85)                      |
| <b>Hospital type</b>      |                                 |
| University (%)            | 5 (31)                          |
| Teaching (%)              | 5 (31)                          |
| Tertiary center (%)       | 6 (38)                          |
| <b>Focus of infection</b> |                                 |
| Joint prosthesis          | 8 (50)                          |
| Urinary tract             | 1 (6)                           |
| Vascular prosthesis       | 5 (31)                          |
| Endocarditis              | 2 (13)                          |
| <b>Treatment duration</b> |                                 |
| 0-2 weeks                 | 2 (13)                          |
| 2-6 weeks                 | 4 (25)                          |
| 6-12 weeks                | 4 (25)                          |
| >12 weeks                 | 6 (38)                          |

379

380

381

382 **Table 2: Quotes related to the initiation phase of OPAT**

| Picker principle                  | Representative quotes                                                                                                                                                                                                                                                                                                                                                                                                            | Patient characteristics (gender, age, weeks of OPAT) |
|-----------------------------------|----------------------------------------------------------------------------------------------------------------------------------------------------------------------------------------------------------------------------------------------------------------------------------------------------------------------------------------------------------------------------------------------------------------------------------|------------------------------------------------------|
| Respect                           | But in such a case, I'd like to see that there is a choice. That it's explained as, 'This is what we want to do. What do you think?' Not: 'This is what we're going to do. Period.'                                                                                                                                                                                                                                              | Male, 52 yrs, 1 week                                 |
| Emotional support                 | That was because I was at my wits' end, the nursing staff themselves arranged to get me an antibiotic device so that I could at least go home on the Sunday afternoon. For a little while.                                                                                                                                                                                                                                       | Female, 71yrs, 6 weeks                               |
| Information                       | At one point I was rolled away and a PICC was placed. I thought, 'What's going on? They could explain a little about how and what?' But they didn't.                                                                                                                                                                                                                                                                             | Female, 70 yrs, 7 weeks                              |
| Coordination                      | Yes, I had the impression that it ( <i>OPAT</i> ) was hardly ever done in the urology department. Because the doctors, the medical specialists, who... They all tell you something different. Look. If it has occurred more often, and if it has happened to a patient more often, then they start telling you everything all at once...                                                                                         | Male, 52 yrs, 1 week                                 |
| Involvement of family and friends | My husband came to visit me every morning at nine thirty because that's when they came round, uh, the doctors and so on. But things just went right over my head, just like that, and then he had stored it all up, and that was certainly important.                                                                                                                                                                            | Female, 70 yrs, 3 weeks                              |
| Involvement of family and friends | If a patient is competent in making decisions, as my father is, then I think if he knows things himself and can tell you, fine, but we must remember that my father is 85, and he can sometimes forget something. So it is always convenient to have an informal caregiver present who can translate that into what is essential, what's coming our way, and in the current trajectory, what is the best method to deal with it? | Male relative                                        |

383

384

385 **Table 3: Quotes related to the transition phase of OPAT**

| Picker principle          | Representative quotes                                                                                                                                                                                                                                                                                                                                                                                                                                                                               | Patient characteristics (gender, age, weeks of OPAT) |
|---------------------------|-----------------------------------------------------------------------------------------------------------------------------------------------------------------------------------------------------------------------------------------------------------------------------------------------------------------------------------------------------------------------------------------------------------------------------------------------------------------------------------------------------|------------------------------------------------------|
| Respect                   | The only thing I had great difficulty with was that actually – yes, nothing against their home care organisation- but that they were forced on me somewhat. At a certain point I said, ‘I have my own home care organisation.’ ‘No, we have contracts with a specific one.’ I thought that in fact the patient still decides who does or does not come to his home.                                                                                                                                 | Male, 80 yrs 8 weeks                                 |
| Information               | But if someone comes to me now ‘I have to go home tomorrow and I’m getting a PICC’, then I would just tell him what a day looked like for me. That’s different for everyone personally.                                                                                                                                                                                                                                                                                                             | Male, 52 yrs, 1 week                                 |
| Coordination              | What also is a very big point, in my opinion, in terms of communication here, is that the first time I was to go home, it didn’t happen. It appears that they had said in the department, ‘You can go home with this antibiotic.’ They had not taken this into account in the department: 3 days go by after they send off the application before they process it here and have the medicines ready. Three days in between, and they had forgotten that. – Forgotten, well, they did not know that. | Male, 52 yrs, 1 week                                 |
| Continuity and transition | They said that I could go home Tuesday, and then it was Friday because the antibiotic was not ready and so on, uhm.                                                                                                                                                                                                                                                                                                                                                                                 | Female, 71yrs, 6 weeks                               |
| Continuity and transition | It went pretty smoothly for me. They said to me on Thursday, ‘We’ll place a PICC for you.’ That was done on Friday, and then they came to tell me, ‘Tomorrow the Home Care will be there.’ That was all very well arranged.                                                                                                                                                                                                                                                                         | Male, 57 yrs, 12 weeks                               |
| Physical comfort          | Medication was administered continuously through the PICC for 6 weeks in the hospital, and now it’s once a day, so this is just great for me. I’m also enjoying life. I am very happy.                                                                                                                                                                                                                                                                                                              | Female, 65 yrs, 12 weeks                             |

386

387



388 Table 4: Quotes related to OPAT care at home

| Picker principle  | Representative quotes                                                                                                                                                                                                                                                                                                                                                                                                                                                                            | Patient characteristics<br>(gender, age, weeks of OPAT) |
|-------------------|--------------------------------------------------------------------------------------------------------------------------------------------------------------------------------------------------------------------------------------------------------------------------------------------------------------------------------------------------------------------------------------------------------------------------------------------------------------------------------------------------|---------------------------------------------------------|
| Access to care    | But you can also contact Home Care 24/7. I liked that.                                                                                                                                                                                                                                                                                                                                                                                                                                           | Female, 65 yrs, 12 weeks                                |
| Respect           | They have experienced nurses, which is very enjoyable. I feel that I have a doctor who checks everything completely and who is at my bedside every day.                                                                                                                                                                                                                                                                                                                                          | Male, 80 yrs 8 weeks                                    |
| Respect           | <p><i>Interviewer:</i> What makes a really a nice home care nurse? A nurse who makes you think: those are the qualities that someone must have, or you think, 'I feel I can really depend on them.'</p> <p><i>Male 78yrs:</i> Have time for you, that you can tell your story.</p> <p><i>Male 52yrs:</i> Then we come back to that word, you know: human.</p> <p><i>Female 70yrs:</i> Not only to connect that thing and get out, but there were also some who sat down to eat at the table.</p> |                                                         |
| Emotional support | You have to... you're stuck with it every day. You eat beforehand, you make sure you tidy up a little and things like that, so you really have no vacation at all nor any rest of your own, not really.                                                                                                                                                                                                                                                                                          | Female, 70 yrs, 3 weeks                                 |
| Emotional support | <p>They say, 'You are free.' But you're not at all. Two hours beforehand you have to take the stuff out of the fridge, they come sometime between 8 and 10 in the morning, so that's 4 hours, and they do that twice a day, so that's 8 hours a day, 8 of the 14 hours that you're up. Then you have little time left for yourself.</p> <p>Look, for a very long period, like months on end, super. Then it's a super system, but not for a period of ... yes, 6 days in my case.</p>            | Male, 52 yrs, 1 week                                    |
| Emotional support | I said this week to my specialist, in my personal case, then, 'Behind every door you expect an exit, but there is another door and yet another door.'                                                                                                                                                                                                                                                                                                                                            | Male, 52 yrs, 1 week                                    |
| Information       | I have not been told anything at all and I am a somewhat surprised, because I do not know how it will turn out. I had expected that at least an interim balance would be drawn up. Something like: 'How                                                                                                                                                                                                                                                                                          | Male, 80 yrs, 8 weeks                                   |

|                                   |                                                                                                                                                                                                                                                                                                                                                                                                                                                                                  |                        |
|-----------------------------------|----------------------------------------------------------------------------------------------------------------------------------------------------------------------------------------------------------------------------------------------------------------------------------------------------------------------------------------------------------------------------------------------------------------------------------------------------------------------------------|------------------------|
|                                   | are we doing?’                                                                                                                                                                                                                                                                                                                                                                                                                                                                   |                        |
| Continuity and transition         | Of course I had to deal with planning for the therapy at the hospital and consequently had to deal with the taxi company and with the Home Care. That was all rather difficult, especially the first few weeks. Things went wrong a number of times. If the first domino falls the wrong way, then the planning for the rest of the day falls apart.                                                                                                                             | Male, 65 yrs, 13 weeks |
| Involvement of family and friends | Interviewer: Are there other things that people should know when they go home and administer this type of antibiotic at home?<br>Male, 47 yrs: No. At least, I’ll just have a look, in my case, because I am younger than all of you: warn people, bear in mind that it is also a violation of your privacy. Especially if you have children who live at home. The time will come when they start saying, ‘Is Home Care here again??’ So it does have an impact on your privacy. | Male, 47 yrs, 57 weeks |
| Physical comfort                  | I only had Home Care for a few weeks, but I would have liked to have had it longer. A year on clindamycin; I have had more problems with that than with the PICC.                                                                                                                                                                                                                                                                                                                | Male, 75 yrs, 1 week   |

389

1  
2  
3 390 **DECLARATION OF INTERESTS**

4  
5 391 The authors declare that they have no competing interests.

6  
7 392 **ACKNOWLEDGEMENTS**

8  
9 393 We are grateful to those interviewed for their generous participation, and to dr. T. Sprong, dr. D.  
10 394 Telgt, dr. F. Vos, ms. H. De Gouw, dr. M. Dautzenberg for facilitating the performance of the study.

11  
12  
13 395 **FUNDING**

14  
15 396 This research received no specific grant from any funding agency in the public, commercial or not-  
16 397 for-profit sectors

17  
18  
19 398 **AUTHOR'S CONTRIBUTION**

20  
21  
22 399 MB, AO, JS, and MH conceived the study. MB and AO performed the data collection. MB, AO, and  
23 400 MH analysed and managed the data, including quality control. MT, BJK, and JtO advised on study  
24 401 design and reviewed the manuscript. MB and AO drafted the manuscript, all authors contributed  
25 402 substantially to its revision. MB takes responsibility for the paper as a whole.

26  
27  
28  
29 403 **DATA SHARING STATEMENT**

30  
31 404 Interview guide and codebook available by request to the corresponding author.  
32  
33  
34  
35  
36  
37  
38  
39  
40  
41  
42  
43  
44  
45  
46  
47  
48  
49  
50  
51  
52  
53  
54  
55  
56  
57  
58  
59  
60

**Manuscript: *Quality of outpatient parenteral antimicrobial therapy (OPAT) care from the patient's perspective: a qualitative study***

M. Berrevoets, A. Oerlemans, M. Tromp, BJ. Kullberg, J. ten Oever, J. Schouten, M. Hulscher

**Consolidated criteria for reporting qualitative studies (COREQ): 32-item checklist**

Developed from:

Tong A, Sainsbury P, Craig J. Consolidated criteria for reporting qualitative research (COREQ): a 32-item checklist for interviews and focus groups. *International Journal for Quality in Health Care*. 2007. Volume 19, Number 6: pp. 349 – 357

| No. Item                                       | Guide questions/description                                                                                                               | Reported on Page # | Relevant passage in text                                                                                                                                                                                                                                                                                               |
|------------------------------------------------|-------------------------------------------------------------------------------------------------------------------------------------------|--------------------|------------------------------------------------------------------------------------------------------------------------------------------------------------------------------------------------------------------------------------------------------------------------------------------------------------------------|
| <b>Domain 1: Research team and reflexivity</b> |                                                                                                                                           |                    |                                                                                                                                                                                                                                                                                                                        |
| <i>Personal Characteristics</i>                |                                                                                                                                           |                    |                                                                                                                                                                                                                                                                                                                        |
| 1. Interviewer/facilitator                     | Which author/s conducted the interview or focus group?                                                                                    | 21                 | Marvin Berrevoets, MD, male resident in infectious diseases and PhD student.<br><br>Anke Oerlemans, PhD, female biomedical scientist and ethicist. Received extensive training in in-depth interviewing, moderating focus groups, and qualitative data analysis. Involved in qualitative research projects since 2005. |
| 2. Credentials                                 | What were the researcher's credentials? E.g. PhD, MD                                                                                      | 21                 |                                                                                                                                                                                                                                                                                                                        |
| 3. Occupation                                  | What was their occupation at the time of the study?                                                                                       | 21                 |                                                                                                                                                                                                                                                                                                                        |
| 4. Gender                                      | Was the researcher male or female?                                                                                                        | 21                 |                                                                                                                                                                                                                                                                                                                        |
| 5. Experience and training                     | What experience or training did the researcher have?                                                                                      | 21                 |                                                                                                                                                                                                                                                                                                                        |
| <i>Relationship with participants</i>          |                                                                                                                                           |                    |                                                                                                                                                                                                                                                                                                                        |
| 6. Relationship established                    | Was a relationship established prior to study commencement?                                                                               | 6                  | Patients were asked to participate by their treating physician and informed by email about the study goals                                                                                                                                                                                                             |
| 7. Participant knowledge of the interviewer    | What did the participants know about the researcher? e.g. personal goals, reasons for doing the research                                  | 6                  | An invitation email was provided with the study setting and goals.                                                                                                                                                                                                                                                     |
| 8. Interviewer characteristics                 | What characteristics were reported about the interviewer/facilitator? e.g. Bias, assumptions, reasons and interests in the research topic | 21-22              | See also #1 - #5<br>Marvin Berrevoets, MD, male resident in infectious diseases and PhD student; OPAT care coordinator in a large teaching hospital, daily involved in the care of OPAT patients;                                                                                                                      |

|  |  |  |                                                                                                                                                                       |
|--|--|--|-----------------------------------------------------------------------------------------------------------------------------------------------------------------------|
|  |  |  | and Anke Oerlemans, PhD, female researcher. Not involved in OPAT care. Leads several research projects on shared decision-making. This study is part of a PhD project |
|--|--|--|-----------------------------------------------------------------------------------------------------------------------------------------------------------------------|

For peer review only

| No. Item                                 | Guide questions/description                                                                                                                              | Reported on Page # | Relevant passage in text                                                                                                                                                                                                                            |
|------------------------------------------|----------------------------------------------------------------------------------------------------------------------------------------------------------|--------------------|-----------------------------------------------------------------------------------------------------------------------------------------------------------------------------------------------------------------------------------------------------|
| <b>Domain 2: study design</b>            |                                                                                                                                                          |                    |                                                                                                                                                                                                                                                     |
| <i>Theoretical framework</i>             |                                                                                                                                                          |                    |                                                                                                                                                                                                                                                     |
| 9. Methodological orientation and Theory | What methodological orientation was stated to underpin the study? e.g. grounded theory, discourse analysis, ethnography, phenomenology, content analysis | 7                  | The analysis included elements of a deductive and an inductive approach: we used the theoretical framework of the Picker principles to guide our analysis as well as additional thematic analysis with open coding to answer our research question. |
| <i>Participant selection</i>             |                                                                                                                                                          |                    |                                                                                                                                                                                                                                                     |
| 10. Sampling                             | How were participants selected? e.g. purposive, convenience, consecutive, snowball                                                                       | 6                  | Purposive sampling                                                                                                                                                                                                                                  |
| 11. Method of approach                   | How were participants approached? e.g. face-to-face, telephone, mail, email                                                                              | 6                  | Face-to-face by treating physician, subsequently by (e)mail about the study objectives                                                                                                                                                              |
| 12. Sample size                          | How many participants were in the study?                                                                                                                 | 8                  | 16 study patients, 2 relatives                                                                                                                                                                                                                      |
| 13. Non-participation                    | How many people refused to participate or dropped out? Reasons?                                                                                          | 8                  | 2 dropped out, 1 patient because of a concomitant appointment with his OPAT team, 1 provided no reason                                                                                                                                              |
| <i>Setting</i>                           |                                                                                                                                                          |                    |                                                                                                                                                                                                                                                     |
| 14. Setting of data collection           | Where was the data collected? e.g. home, clinic, workplace                                                                                               | 6                  | Hospital where patients had been treated and OPAT care was initiated                                                                                                                                                                                |
| 15. Presence of non-participants         | Was anyone else present besides the participants and researchers?                                                                                        | 6                  | Focus groups were led by a moderator in presence of one researcher                                                                                                                                                                                  |
| 16. Description of sample                | What are the important characteristics of the sample? e.g. demographic data, date                                                                        | 6                  | Age, gender, diagnosis, and treatment duration                                                                                                                                                                                                      |
| <i>Data collection</i>                   |                                                                                                                                                          |                    |                                                                                                                                                                                                                                                     |
| 17. Interview guide                      | Were questions, prompts, guides provided by the authors? Was it pilot tested?                                                                            | 6                  | Interview guide was based on the 8 Picker principles of patient-centered care and followed the chronology of the OPAT care process. The interview guide was drafted                                                                                 |

|                                        |                                                                                                                                 |             |                                                                                                                                                                                                                |
|----------------------------------------|---------------------------------------------------------------------------------------------------------------------------------|-------------|----------------------------------------------------------------------------------------------------------------------------------------------------------------------------------------------------------------|
|                                        |                                                                                                                                 |             | by MB and AO, and discussed with and reviewed by JS and MH.                                                                                                                                                    |
| 18. Repeat interviews                  | Were repeat interviews carried out? If yes, how many?                                                                           | 6           | All participants were interviewed once, no repeat interviews were conducted.                                                                                                                                   |
| 19. Audio/visual recording             | Did the research use audio or visual recording to collect the data?                                                             | 7           | Interviews were recorded with a digital voice recorder                                                                                                                                                         |
| 20. Field notes                        | Were field notes made during and/or after the interview or focus group?                                                         | 7           | The moderator and researcher made sporadic field notes during the focus groups, and debriefed immediately following the focus groups. The recorded data was transcribed verbatim by an independent transcriber |
| 21. Duration                           | What was the duration of the interviews or focus group?                                                                         | 8           | 90-120 minutes each                                                                                                                                                                                            |
| 22. Data saturation                    | Was data saturation discussed?                                                                                                  | 6           | Number of focus groups depended on the point of saturation                                                                                                                                                     |
| 23. Transcripts returned               | Were transcripts returned to participants for comment and/or correction?                                                        | n/a         | No                                                                                                                                                                                                             |
| <b>Domain 3: analysis and findings</b> |                                                                                                                                 |             |                                                                                                                                                                                                                |
| <i>Data analysis</i>                   |                                                                                                                                 |             |                                                                                                                                                                                                                |
| 24. Number of data coders              | How many data coders coded the data?                                                                                            | 7           | 2 in total (moderator and researcher)                                                                                                                                                                          |
| 25. Description of the coding tree     | Did authors provide a description of the coding tree?                                                                           | n/a         | No; overview of codes and categories available from the authors on request.                                                                                                                                    |
| 26. Derivation of themes               | Were themes identified in advance or derived from the data?                                                                     | 7           | Yes and no: a priori codes based on the Picker principles, and open codes derived from data through thematic content analysis.                                                                                 |
| 27. Software                           | What software, if applicable, was used to manage the data?                                                                      | 7           | Atlas.ti 7                                                                                                                                                                                                     |
| 28. Participant checking               | Did participants provide feedback on the findings?                                                                              | 7           | No                                                                                                                                                                                                             |
| <i>Reporting</i>                       |                                                                                                                                 |             |                                                                                                                                                                                                                |
| 29. Quotations presented               | Were participant quotations presented to illustrate the themes/findings? Was each quotation identified? e.g. participant number | Table 2,3,4 | See corresponding tables                                                                                                                                                                                       |

1  
2  
3  
4  
5  
6  
7  
8  
9  
10  
11  
12  
13  
14  
15  
16  
17  
18  
19  
20  
21  
22  
23  
24  
25  
26  
27  
28  
29  
30  
31  
32  
33  
34  
35  
36  
37  
38  
39  
40  
41  
42  
43  
44  
45  
46  
47  
48  
49  
50  
51  
52  
53  
54  
55  
56  
57  
58  
59  
60

|                                  |                                                                        |                    |                                                |
|----------------------------------|------------------------------------------------------------------------|--------------------|------------------------------------------------|
|                                  |                                                                        |                    |                                                |
| 30. Data and findings consistent | Was there consistency between the data presented and the findings?     | 8-13, Tables 2,3,4 | See relevant passages in manuscript            |
| 31. Clarity of major themes      | Were major themes clearly presented in the findings?                   | 11                 | Two central values emerged: freedom and safety |
| 32. Clarity of minor themes      | Is there a description of diverse cases or discussion of minor themes? | 11-13              | See relevant passages in the manuscript        |

For peer review only
